# Supplementary material for: Turning around Cycles: An Approach Based on Selected Problems/Cases to Stimulate Collaborative Learning about Krebs and His Four Metabolic Cycles
Source: PubMed Central journal article supplement (PMC9202563; doi:10.1021/acs.jchemed.1c01038), 2022-05-25
Supplement: ed1c01038_si_003.pdf [file ed1c01038_si_003.pdf]

“Nickname”: \_\_\_\_\_

## QUESTIONS ABOUT "PROBLEM-BASED LEARNING" (PBL)

Circle the letter corresponding to the answer of your choice for each question.

**1. Prior to this course, did you know or have you heard of Problem-Based Learning (PBL)?**

- a. Yes
- b. No

**2. Have you ever employed this methodology?**

- a. No
- b. Yes

If so, briefly explain in what context you used it (educational level, subject, etc.)

---

---

---

---

**Read and evaluate from 1 to 4 (1-minimum; 4-maximum) your level of experience and the importance you give to the following:**

|     |                                                                                                | Experience | Importance |
|-----|------------------------------------------------------------------------------------------------|------------|------------|
| 3.  | To solve a problem or an issue autonomously, without the explicit help of your teacher         |            |            |
| 4.  | Learning, working in a group, in a collaborative environment                                   |            |            |
| 5.  | To be the main protagonist or responsible of your apprenticeship                               |            |            |
| 6.  | Receiving a class, unconventional, in which the teacher acts only as a facilitator of the task |            |            |
| 7.  | To use a learning methodology that can serve for different subjects or disciplines             |            |            |
| 8.  | Diagnosing what I need to know or learn in order to solve a problem or issue                   |            |            |
| 9.  | To plan my learning process and the actions needed to solve an issue or problem                |            |            |
| 10. | Integrate knowledge of different subjects or disciplines                                       |            |            |
| 11. | Making decisions about what and how to learn                                                   |            |            |
