# Supplementary material for: Turning around Cycles: An Approach Based on Selected Problems/Cases to Stimulate Collaborative Learning about Krebs and His Four Metabolic Cycles
Source: PubMed Central journal article supplement (PMC9202563; doi:10.1021/acs.jchemed.1c01038), 2022-05-25
Supplement: ed1c01038_si_004.pdf [file ed1c01038_si_004.pdf]

## PERCEPTION TEST ON KREBS AND HIS FOUR METABOLIC CYCLES PBL

Course: \_\_\_\_\_

Nickname: \_\_\_\_\_

| #  | Questions                                                                                                                                                  | TA | A | D | TD |
|----|------------------------------------------------------------------------------------------------------------------------------------------------------------|----|---|---|----|
| 1  | I find this course useful and interesting.                                                                                                                 |    |   |   |    |
| 2  | The "PBL" methodology used for the solving of the Krebs' cycle case is a novelty with respect to other ways of learning other topics of this same subject. |    |   |   |    |
| 3  | The Krebs cycle case did not seem particularly complex to me and could be solved well mostly.                                                              |    |   |   |    |
| 4  | I believe that the group's work dynamic has been efficient and satisfactory.                                                                               |    |   |   |    |
| 5  | I did not like working autonomously, without the teacher being directly responsible for my learning.                                                       |    |   |   |    |
| 6  | The information provided in the Krebs' cycle case was relevant and sufficient to solve it.                                                                 |    |   |   |    |
| 7  | Sometimes we have been at a loss as to how to approach solving some part of the Krebs' cycle case.                                                         |    |   |   |    |
| 8  | With this methodology (PBL) I have felt particularly involved.                                                                                             |    |   |   |    |
| 9  | The length of the Krebs' cycle case did not seem adequate to me.                                                                                           |    |   |   |    |
| 10 | I think we have been able to plan well the work of the group to solve the proposed case.                                                                   |    |   |   |    |
| 11 | With this methodology (PBL) I have not learned more than the traditional way of studying in this or other subjects.                                        |    |   |   |    |
| 12 | I have found the time required to solve the Krebs' cycle case to be adequate.                                                                              |    |   |   |    |
| 13 | This work methodology (PBL) has not required more work and preparation on my part than in others of the same or other subjects.                            |    |   |   |    |
| 14 | In solving the Krebs' cycle case we have had the guidance of the professor whenever we have requested it.                                                  |    |   |   |    |
| 15 | It seems to me that not all members of the group have worked with the same intensity and that some have taken advantage.                                   |    |   |   |    |

(TA: Totally agree; A: Agree; D: Disagree; TD: Totally disagree)

(Please continue on the back...)

## PERCEPTION TEST ON KREBS AND HIS FOUR METABOLIC CYCLES PBL

**16. Overall, can you rate your degree of satisfaction with this activity?**

- Not at all satisfied    - Not very satisfied    - Satisfied    - Very satisfied

**17. After taking this course, what does Problem Based Learning mean to you?**

---



---



---



---



---



---



---



---



---



---

**18. Read and evaluate from 1 to 4 (1-minimum; 4-maximum) your level of experience and the importance you give to the following:**

|   |                                                                                                | Experience | Importance |
|---|------------------------------------------------------------------------------------------------|------------|------------|
| 1 | To solve a problem or an issue autonomously, without the explicit help of your teacher         |            |            |
| 2 | Learning, working in a group, in a collaborative environment                                   |            |            |
| 3 | To be the main protagonist or responsible of your apprenticeship                               |            |            |
| 4 | Receiving a class, unconventional, in which the teacher acts only as a facilitator of the task |            |            |
| 5 | To use a learning methodology that can serve for different subjects or disciplines             |            |            |
| 6 | Diagnosing what I need to know or learn in order to solve a problem or issue                   |            |            |
| 7 | To plan my learning process and the actions needed to solve an issue or problem                |            |            |
| 8 | Integrate knowledge of different subjects or disciplines                                       |            |            |
| 9 | Making decisions about what and how to learn                                                   |            |            |
